# Supplementary material
Source: MDPI journal article supplement (https://www.mdpi.com/2311-7524/9/5/532)
Supplement: s1 [file s1]

Figure S1: Phylogenetic tree constructed with 146 ABC protein sequences with the ABC from *Arabidopsis thaliana*. Different color represents different subfamilies of ABC genes. The MEGA X software was used to construct the tree by Neighbor-Joining method.

Figure S2. Putative cis-elements exist in the upstream 2 kb region of ABCC protein genes (1 to 10 represent *VvABCC1*, *VvABCC2*, *VvABCC3*, *VvABCC14*, *VvABCC19*, *VvABCC25*, *VvABCC26*, *VvABCC27*, *VvABCC29* and *VvABCC28*, respectively). The orange box indicates that a particular element exists, and the white box indicates that it does not exist.
